# Supplementary material
Source: PubMed Central journal article supplement (PMC3523644)

## SUPPLEMENTARY DATA

TABLE S1. Genotypes used in this study

| Group        | Scientific name (Swingle)                          | Scientific name (Tanaka)                           | Cultivar               | Ref.*   |
|--------------|----------------------------------------------------|----------------------------------------------------|------------------------|---------|
| Mandarin     | <i>C. reticulata</i> var. <i>austera</i>           | <i>C. reshni</i> Hort. ex Tan.                     | Cleopatra              | 385I    |
| Mandarin     | <i>C. reticulata</i> Blanco                        | <i>C. deliciosa</i> Ten                            | Willow leaf            | 154I    |
| Mandarin     | <i>C. reticulata</i> Blanco                        | <i>C. reticulata</i> Blanco                        | Ponkan                 | 482I    |
| Mandarin     | <i>C. reticulata</i> var. <i>austera</i>           | <i>C. sunki</i> Hort. ex Tan.                      | Sunki                  | 239I    |
| Mandarin     | <i>C. reticulata</i> Blanco                        | <i>C. tangerina</i> Hort. ex Tan.                  | Dancy                  | 434I    |
| Mandarin     | <i>C. reticulata</i> Blanco                        | <i>C. unshiu</i> (Mak.) Marc.                      | Clausellina            | 19I     |
| Mandarin     | <i>C. reticulata</i> Blanco                        | <i>C. deliciosa</i> Ten                            | Avana apireno          | 189I    |
| Pummelo      | <i>C. maxima</i> (Burm.) Merr.                     | <i>C. maxima</i> (Burm.) Merr.                     | Chandler               | 207I    |
| Pummelo      | <i>C. maxima</i> (Burm.) Merr.                     | <i>C. maxima</i> (Burm.) Merr.                     | Pink                   | 275I    |
| Pummelo      | <i>C. maxima</i> (Burm.) Merr.                     | <i>C. maxima</i> (Burm.) Merr.                     | Nam Roi                | 590I    |
| Pummelo      | <i>C. maxima</i> (Burm.) Merr.                     | <i>C. maxima</i> (Burm.) Merr.                     | Tahiti                 | 727C    |
| Pummelo      | <i>C. maxima</i> (Burm.) Merr.                     | <i>C. maxima</i> (Burm.) Merr.                     | Sans Pepins            | 710C    |
| Citron       | <i>C. medica</i> L.                                | <i>C. medica</i> L.                                | Corsica                | 567I    |
| Citron       | <i>C. medica</i> L.                                | <i>C. medica</i> L.                                | Buddha's hand          | 202I    |
| Citron       | <i>C. medica</i> L.                                | <i>C. medica</i> L.                                | Diamante               | 560I    |
| Citron       | <i>C. medica</i> L.                                | <i>C. medica</i> L.                                | Arizona                | 169I    |
| Citron       | <i>C. medica</i> L.                                | <i>C. medica</i> L.                                | Poncire commun         | 701C    |
| Papeda       | <i>C. micrantha</i> Wester                         | <i>C. micrantha</i> Wester                         | Small flowered papeda  | 626I    |
| Papeda       | <i>C. hystrix</i> DC.                              | <i>C. hystrix</i> DC.                              | Mauritius papeda       | 178I    |
| Papeda       | <i>C. ichangensis</i> Swing.                       | <i>C. ichangensis</i> Swing.                       | Ichang papeda          | 358I    |
| Papeda       | <i>C. macroptera</i> Montr.                        | <i>C. macroptera</i> Montr.                        | Melanesian papeda      | 279I    |
| Fortunella   | <i>F. hindsii</i> (Champ.) Swing.                  | <i>F. hindsii</i> (Champ.) Swing.                  | Hong Kong kumkuat      | 281I    |
| Fortunella   | <i>Fortunella</i> hybrid                           | <i>F. crassifolia</i> Swing.                       | Meiwa kumkuat          | 280I    |
| Fortunella   | <i>F. japonica</i> (Thunb.) Swing.                 | <i>F. japonica</i> (Thunb.) Swing.                 | Round kumkuat          | 381I    |
| Fortunella   | <i>F. polyandra</i> (Ridl.) Tan                    | <i>F. polyandra</i> (Ridl.) Tan.                   | Malayan kumkuat        | 375I    |
| Fortunella   | <i>F. margarita</i> (Lour.) Swing.                 | <i>F. margarita</i> (Lour.) Swing.                 | Nagami kumkuat         | 38I     |
| Microcitrus  | <i>Microcitrus australasica</i> (F. Muell.) Swing. | <i>Microcitrus australasica</i> (F. Muell.) Swing. | Australian finger lime | 150I    |
| Microcitrus  | <i>Microcitrus australis</i> (F. Muell.) Swing.    | <i>Microcitrus australis</i> (F. Muell.) Swing.    | Australian round lime  | 313I    |
| Eremocitrus  | <i>Eremocitrus glauca</i> (Lindl.)                 | <i>Eremocitrus glauca</i> (Lindl.)                 | Australian desert lime | 346I    |
| Poncirus     | <i>Poncirus trifoliata</i> (L.) Raf.               | <i>Poncirus trifoliata</i> (L.) Raf.               | Pomeroy                | 374I    |
| Poncirus     | <i>Poncirus trifoliata</i> (L.) Raf.               | <i>Poncirus trifoliata</i> (L.) Raf.               | Rubidoux               | 217I    |
| Poncirus     | <i>Poncirus trifoliata</i> (L.) Raf.               | <i>Poncirus trifoliata</i> (L.) Raf.               | Flying dragon          | 537I    |
| Haploid      | <i>C. reticulata</i> Blanco                        | <i>C. clementina</i> Hort. ex Tan.                 | Haploid                | HapClem |
| Clementine   | <i>C. reticulata</i> Blanco                        | <i>C. clementina</i> Hort. ex Tan.                 | Clemenules             | 22I     |
| Clementine   | <i>C. reticulata</i> Blanco                        | <i>C. clementina</i> Hort. ex Tan.                 | Arrufatina             | 58I     |
| Tangelo      | <i>C. reticulata</i> x <i>C. paradisi</i>          | <i>C. reticulata</i> x <i>C. paradisi</i>          | Orlando                | 101I    |
| Tangor       | <i>C. reticulata</i> x <i>C. sinensis</i>          | <i>C. nobilis</i> Lour.                            | King                   | 477I    |
| Sweet orange | <i>C. sinensis</i> (L.) Osb                        | <i>C. sinensis</i> (L.) Osb                        | Valencia Late Delta    | 363I    |
| Sweet orange | <i>C. sinensis</i> (L.) Osb                        | <i>C. sinensis</i> (L.) Osb                        | Salustiana             | 125I    |
| Grapefruit   | <i>C. paradisi</i> Macf                            | <i>C. paradisi</i> Macf                            | Marsh                  | 176I    |
| Sour orange  | <i>C. aurantium</i> L.                             | <i>C. aurantium</i> L.                             | Sevillano              | 117I    |
| Sour orange  | <i>C. aurantium</i> L.                             | <i>C. aurantium</i> L.                             | Bouquet de Fleurs      | 139I    |
| Lime         | <i>C. aurantifolia</i> (Christm.) Swing.           | <i>C. aurantifolia</i> (Christm.) Swing.           | Mexican                | 164I    |
| Lemon        | <i>C. limon</i> (L.) Burm                          | <i>C. limon</i> (L.) Burm                          | Eureka                 | 297I    |
| Severinia    | <i>Severinia buxifolia</i> (Poir.) Tenore          | <i>Severinia buxifolia</i> (Poir.) Tenore          | Chinese box orange     | 147I    |

\*(I) IVIA germplasm; (C) INRA germplasm.

TABLE S2. New indel primers developed from polymorphisms found during sequencing of the candidate genes

| Primer  | GBA      | Sequence                       | Length | T <sub>m</sub> | PCR | Product size (bp) |
|---------|----------|--------------------------------|--------|----------------|-----|-------------------|
| IDCHI2  | DY263683 | F:AATCAATTATTTCCACATT          | 20     | 48.91          | 50  | 94–96             |
|         |          | R:ATTACACGTAACGCAAGA           | 18     | 53.2           |     |                   |
| IDFLS1  | AB011796 | F:GATCATCTCTCCACAGG            | 18     | 50.64          | 50  | 144–158           |
|         |          | R:GAAAATAAATTATTTATACATTTTGTTT | 28     | 52.86          |     |                   |
| IDFLS2  | AB011796 | F:AAACAAAATGTATAAATAATTTATTTTC | 28     | 52.86          | 50  | 184–204           |
|         |          | R:AGCATGTACTCAATGTCG           | 18     | 49.76          |     |                   |
| IDF3'H1 | HQ634392 | F:AAAGGCTCACCATCACCAAC         | 20     | 59.97          | 55  | 180–196           |
|         |          | R:AAAATGAACAACACAAAAGAAAGACC   | 25     | 55.2           |     |                   |
| IDDFR1  | DQ084722 | F:CCACGCCTATGGACTTTGAG         | 20     | 60.65          | 55  | 181–192           |
|         |          | R:TCAATGTTATGCGGCTGTTC         | 20     | 59.69          |     |                   |
| IDDFR2  | DQ084722 | F:ACTGTTCGCGATCCTGGT           | 18     | 59.21          | 55  | 140–156           |
|         |          | R:GCAACTCCAGCAAATGTTTC         | 20     | 58.35          |     |                   |
| IDINVA1 | AB074885 | F:GAGCTCCCTTTTGCTTAAT          | 20     | 57.58          | 55  | 218–220           |
|         |          | R:AGTAGCTGAGCCAACATCAA         | 20     | 56.09          |     |                   |
| IDINVA2 | AB074885 | F:CCTTCTGGTTCTTGCAGAT          | 19     | 55.35          | 55  | 233–237           |
|         |          | R:TATTGACATCATTTGCCTCA         | 20     | 55.01          |     |                   |
| IDINVA3 | AB074885 | F:TTCTGAGGCAAATGATGTCAA        | 21     | 59.26          | 55  | 203–206           |
|         |          | R:CGAATGATCCACCTGCAAAT         | 20     | 60.86          |     |                   |
| IDPEPC3 | EF058158 | F:TTTGTGATGTTCCACAAATG         | 20     | 55.3           | 55  | 130–133           |
|         |          | R:CTACCATTAGCCGATTGTTC         | 20     | 54.93          |     |                   |
| IDPFK1  | AF095520 | F:AAAACCCTTTCAAATCGTC          | 20     | 55.85          | 55  | 246–248           |
|         |          | R:CCGATTTTCAACTTCTCATC         | 20     | 54.84          |     |                   |
| IDPSY2  | AB037975 | F:TTGAGTCATGCCATTTTGC          | 20     | 59.67          | 55  | 347–364           |
|         |          | R:ATTGGGTTAAGGGTCCACTG         | 20     | 58.76          |     |                   |

GBA: Gene Bank Accession.

T<sub>m</sub>: melting temperature

TABLE S3. Nucleotide diversity and divergence for each gene and taxa. Abbreviations: Mand, *C. reticulata*; Pum, *C. maxima*; Cit, *C. medica*; For, *Fortunella*; Pap, Papeda, wild citrus; Mic, *Microcitrus*; Ere, *Eremocitrus*; Pon, *Poncirus trifoliata*; AncTaxa, *C. reticulata*, *C. maxima*, *C. medica*, wild citrus; Pop, population; S, segregating sites;  $\pi_T$ , total nucleotide diversity;  $\pi_{sil}$ , nucleotide diversity silent sites;  $\pi_{syn}$ , nucleotide diversity synonymous sites;  $\pi_{nonsyn}$ , nucleotide diversity non-synonymous sites;  $\pi_{nonsyn/syn}$ , ratio of nucleotide diversity non-synonymous / synonymous sites;  $\pi_{nonsyn}/\pi_{sil}$ , ratio of nucleotide diversity non-synonymous/silent sites;  $D_{tajima}$ , Tajima's *D* neutrality test;  $N_h$ , number of haplotypes;  $H_e$ , haplotype diversity; s.d., standard deviation;  $F_{st}$ , Wright's differentiation index. See Table 1 in main text for locus abbreviations

| Locus | Taxa      | S     | Polymorphism |             |             |                |                          |                          | Haplotype diversity |       |       |       |          |
|-------|-----------|-------|--------------|-------------|-------------|----------------|--------------------------|--------------------------|---------------------|-------|-------|-------|----------|
|       |           |       | $\pi_T$      | $\pi_{sil}$ | $\pi_{syn}$ | $\pi_{nonsyn}$ | $\pi_{nonsyn}/\pi_{syn}$ | $\pi_{nonsyn}/\pi_{sil}$ | $D_{tajima}$        | $N_h$ | $H_e$ | s.d.  | $F_{st}$ |
| CHI   | Mand      | 20    | 0.009        | 0.010       | 0.011       | 0.006          | 0.522                    | 0.541                    |                     | 7     | 0.833 | 0.072 | 0.757    |
|       | Pum       | 6     | 0.003        | 0.002       | 0.000       | 0.007          | -                        | 3.036                    |                     | 5     | 0.756 | 0.130 |          |
|       | Cit       | 21    | 0.013        | 0.017       | 0.007       | 0.002          | 0.320                    | 0.136                    |                     | 3     | 0.622 | 0.138 |          |
|       | For       | 12    | 0.007        | 0.007       | 0.000       | 0.006          | -                        | 0.848                    |                     | 5     | 0.667 | 0.163 |          |
|       | Pap       | 22    | 0.014        | 0.016       | 0.000       | 0.007          | -                        | 0.425                    |                     | 5     | 0.933 | 0.122 |          |
|       | Mic       | 8     | 0.008        | 0.010       | 0.000       | 0.004          | -                        | 0.448                    |                     | 2     | 0.667 | 0.204 |          |
|       | Ere       | 0     | 0.000        | 0.000       | 0.000       | 0.000          | -                        | -                        |                     | 1     | 0.000 | 0.000 |          |
|       | Pon       | 1     | 0.001        | 0.001       | 0.000       | 0.000          | -                        | 0.000                    |                     | 2     | 0.600 | 0.129 |          |
|       | AncTaxa   | 73    | 0.026        | 0.032       | 0.008       | 0.011          | 1.381                    | 0.361                    | -0.300              | 28    | 0.959 | 0.010 |          |
|       | Whole Pop | 76    | 0.024        | 0.030       | 0.008       | 0.010          | 1.377                    | 0.350                    | -0.407              | 34    | 0.958 | 0.008 |          |
| s.d.  |           |       | 0.001        |             |             |                |                          |                          |                     |       |       |       |          |
| CHS   | Mand      | 1     | 0.001        | 0.003       | 0.003       | 0.000          | 0.000                    | 0.000                    |                     | 2     | 0.440 | 0.112 | 0.698    |
|       | Pum       | 0     | 0.000        | 0.000       | 0.000       | 0.000          | -                        | -                        |                     | 1     | 0.000 | 0.000 |          |
|       | Cit       | 0     | 0.000        | 0.000       | 0.000       | 0.000          | -                        | -                        |                     | 1     | 0.000 | 0.000 |          |
|       | For       | 4     | 0.001        | 0.005       | 0.005       | 0.000          | 0.096                    | 0.096                    |                     | 3     | 0.378 | 0.181 |          |
|       | Pap       | 5     | 0.004        | 0.009       | 0.009       | 0.002          | 0.207                    | 0.207                    |                     | 5     | 0.933 | 0.122 |          |
|       | Mic       | 4     | 0.003        | 0.008       | 0.008       | 0.002          | 0.289                    | 0.289                    |                     | 2     | 0.500 | 0.265 |          |
|       | Ere       | 1     | 0.002        | 0.008       | 0.008       | 0.000          | 0.000                    | 0.000                    |                     | 2     | 1.000 | 0.500 |          |
|       | Pon       | 0     | 0.000        | 0.000       | 0.000       | 0.000          | -                        | -                        |                     | 1     | 0.000 | 0.000 |          |
|       | AncTaxa   | 20    | 0.004        | 0.016       | 0.016       | 0.001          | 0.079                    | 0.079                    | -1.256              | 14    | 0.885 | 0.015 |          |
|       | Whole Pop | 20    | 0.004        | 0.015       | 0.014       | 0.001          | 0.065                    | 0.064                    | -1.258              | 15    | 0.857 | 0.018 |          |
| s.d.  |           |       | 0.000        |             |             |                |                          |                          |                     |       |       |       |          |
| FLS   | Mand      | 14    | 0.008        | 0.015       | 0.019       | 0.002          | 0.442                    | 0.145                    |                     | 7     | 0.817 | 0.073 | 0.608    |
|       | Pum       | 4     | 0.004        | 0.007       | 0.005       | 0.003          | 0.567                    | 0.372                    |                     | 5     | 0.844 | 0.080 |          |
|       | Cit       | 0     | 0.000        | 0.000       | 0.000       | 0.000          | -                        | -                        |                     | 1     | 0.000 | 0.000 |          |
|       | For       | 7     | 0.007        | 0.017       | 0.018       | 0.003          | 0.151                    | 0.167                    |                     | 6     | 0.889 | 0.075 |          |
|       | Pap       | 14    | 0.014        | 0.040       | 0.033       | 0.004          | 0.137                    | 0.113                    |                     | 6     | 1.000 | 0.096 |          |
|       | Mic       | 8     | 0.010        | 0.025       | 0.030       | 0.004          | 0.121                    | 0.142                    |                     | 4     | 1.000 | 0.177 |          |
|       | Ere       | 10    | 0.022        | 0.046       | 0.064       | 0.012          | 0.191                    | 0.267                    |                     | 2     | 1.000 | 0.500 |          |
|       | Pon       | 4     | 0.004        | 0.008       | 0.011       | 0.003          | 0.240                    | 0.332                    |                     | 5     | 0.933 | 0.122 |          |
|       | AncTaxa   | 45    | 0.021        | 0.055       | 0.059       | 0.007          | 0.122                    | 0.131                    | -0.329              | 34    | 0.958 | 0.014 |          |
|       | Whole Pop | 47    | 0.020        | 0.055       | 0.062       | 0.007          | 0.120                    | 0.135                    | -0.211              | 48    | 0.960 | 0.011 |          |
| s.d.  |           |       | 0.001        |             |             |                |                          |                          |                     |       |       |       |          |
| F3'H  | Mand      | 10    | 0.004        | 0.003       | 0.003       | 0.005          | 1.767                    | 1.714                    |                     | 6     | 0.747 | 0.111 | 0.574    |
|       | Pum       | 4     | 0.002        | 0.001       | 0.000       | 0.004          | -                        | 6.066                    |                     | 4     | 0.733 | 0.101 |          |
|       | Cit       | 6     | 0.003        | 0.005       | 0.000       | 0.002          | -                        | 0.383                    |                     | 4     | 0.778 | 0.091 |          |
|       | For       | 21    | 0.012        | 0.011       | 0.013       | 0.014          | 1.048                    | 1.312                    |                     | 7     | 0.933 | 0.062 |          |
|       | Pap       | 10    | 0.006        | 0.005       | 0.010       | 0.006          | 0.619                    | 1.136                    |                     | 6     | 1.000 | 0.096 |          |
|       | Mic       | 10    | 0.007        | 0.012       | 0.019       | 0.006          | 0.327                    | 0.534                    |                     | 3     | 0.833 | 0.222 |          |
|       | Ere       | 0     | 0.000        | 0.000       | 0.000       | 0.000          | -                        | -                        |                     | 1     | 0.000 | 0.000 |          |
|       | Pon       | 1     | 0.001        | 0.002       | 0.000       | 0.000          | -                        | 0.000                    |                     | 2     | 0.600 | 0.129 |          |
|       | AncTaxa   | 55    | 0.010        | 0.013       | 0.016       | 0.008          | 0.515                    | 0.612                    | -1.285              | 33    | 0.970 | 0.009 |          |
|       | Whole Pop | 60    | 0.009        | 0.012       | 0.014       | 0.008          | 0.554                    | 0.643                    | -1.474              | 36    | 0.949 | 0.013 |          |
| s.d.  |           |       | 0.001        |             |             |                |                          |                          |                     |       |       |       |          |
| DFR   | Mand      | 1     | 0.000        | 0.000       | 0.000       | 0.001          | -                        | -                        |                     | 2     | 0.143 | 0.119 | 0.675    |
|       | Pum       | 1     | 0.000        | 0.001       | 0.000       | 0.000          | -                        | 0.000                    |                     | 2     | 0.200 | 0.154 |          |
|       | Cit       | 4     | 0.004        | 0.006       | 0.025       | 0.000          | 0.000                    | 0.000                    |                     | 5     | 0.822 | 0.097 |          |
|       | For       | 7     | 0.007        | 0.010       | 0.006       | 0.000          | 0.000                    | 0.000                    |                     | 6     | 0.867 | 0.085 |          |
|       | Pap       | 7     | 0.008        | 0.012       | 0.009       | 0.000          | 0.000                    | 0.000                    |                     | 5     | 0.933 | 0.122 |          |
|       | Mic       | 4     | 0.005        | 0.008       | 0.000       | 0.000          | -                        | 0.000                    |                     | 3     | 0.833 | 0.222 |          |
|       | Ere       | 4     | 0.010        | 0.011       | 0.000       | 0.007          | -                        | 0.660                    |                     | 2     | 1.000 | 0.500 |          |
|       | Pon       | 3     | 0.004        | 0.005       | 0.000       | 0.000          | -                        | 0.000                    |                     | 3     | 0.733 | 0.155 |          |
|       | AncTaxa   | 32    | 0.013        | 0.017       | 0.024       | 0.005          | 0.194                    | 0.280                    | -0.893              | 26    | 0.928 | 0.020 |          |
|       | Whole Pop | 32    | 0.011        | 0.015       | 0.019       | 0.005          | 0.248                    | 0.308                    | -0.949              | 34    | 0.898 | 0.026 |          |
| s.d.  |           |       | 0.001        |             |             |                |                          |                          |                     |       |       |       |          |
| EMA   | Mand      | 3     | 0.004        | 0.005       | 0.000       | 0.000          | -                        | 0.000                    |                     | 3     | 0.667 | 0.075 |          |
|       | Pum       | 1     | 0.000        | 0.001       | 0.000       | 0.000          | -                        | 0.000                    |                     | 2     | 0.200 | 0.154 |          |
|       | Cit       | 1     | 0.001        | 0.002       | 0.000       | 0.000          | -                        | 0.000                    |                     | 2     | 0.533 | 0.095 |          |
|       | For       | 10    | 0.007        | 0.008       | 0.006       | 0.002          | 0.308                    | 0.246                    |                     | 7     | 0.911 | 0.077 |          |
|       | Pap       | 2     | 0.007        | 0.000       | 0.011       | 0.003          | 0.255                    | -                        |                     | 3     | 0.733 | 0.155 |          |
|       | Mic       | 8     | 0.010        | 0.013       | 0.016       | 0.000          | 0.000                    | 0.000                    |                     | 3     | 0.833 | 0.222 |          |
| Ere   | 3         | 0.007 | 0.010        | 0.032       | 0.000       | 0.000          | 0.000                    |                          | 2                   | 1.000 | 0.500 |       |          |

|             |           |    |       |       |       |       |       |       |        |    |       |         |       |
|-------------|-----------|----|-------|-------|-------|-------|-------|-------|--------|----|-------|---------|-------|
|             | Pon       | 5  | 0.005 | 0.007 | 0.000 | 0.000 | -     | 0.000 |        | 3  | 0.600 | 0.215   |       |
|             | AncTaxa   | 34 | 0.014 | 0.017 | 0.003 | 0.005 | 1.511 | 0.289 | -0.732 | 21 | 0.921 | 0.018   | 0.677 |
|             | Whole Pop | 34 | 0.013 | 0.016 | 0.002 | 0.005 | 2.273 | 0.323 | -0.622 | 27 | 0.914 | (0.016) |       |
|             | s.d.      |    | 0.001 |       |       |       |       |       |        |    |       |         |       |
| <b>MDH</b>  | Mand      | 6  | 0.002 | 0.004 | 0.004 | 0.001 | 0.179 | 0.179 |        | 3  | 0.908 | 0.115   |       |
|             | Pum       | 2  | 0.002 | 0.000 | 0.000 | 0.002 | -     | -     |        | 2  | 0.538 | 0.075   |       |
|             | Cit       | 0  | 0.000 | 0.000 | 0.000 | 0.000 | -     | -     |        | 1  | 0.556 | 0.000   |       |
|             | For       | 10 | 0.005 | 0.011 | 0.011 | 0.004 | 0.338 | 0.338 |        | 7  | 0.000 | 0.077   |       |
|             | Pap       | 6  | 0.004 | 0.007 | 0.007 | 0.003 | 0.418 | 0.418 |        | 4  | 0.867 | 0.129   |       |
|             | Mic       | 5  | 0.004 | 0.011 | 0.011 | 0.002 | 0.235 | 0.235 |        | 3  | 0.821 | 0.222   |       |
|             | Ere       | 4  | 0.006 | 0.000 | 0.000 | 0.007 | -     | -     |        | 2  | 0.833 | 0.500   |       |
|             | Pon       | 1  | 0.001 | 0.000 | 0.000 | 0.001 | -     | -     |        | 2  | 1.000 | 0.129   |       |
|             | AncTaxa   | 31 | 0.007 | 0.014 | 0.014 | 0.005 | 0.356 | 0.356 | -0.768 | 21 | 0.929 | 0.015   | 0.677 |
|             | Whole Pop | 31 | 0.006 | 0.012 | 0.012 | 0.005 | 1.065 | 0.394 | -0.835 | 23 | 0.600 | 0.014   |       |
|             | s.d.      |    | 0.000 |       |       |       |       |       |        |    |       |         |       |
| <b>ACO</b>  | Mand      | 3  | 0.001 | 0.001 | 0.000 | 0.001 | -     | 0.778 |        | 3  | 0.473 | 0.136   |       |
|             | Pum       | 9  | 0.007 | 0.010 | 0.008 | 0.000 | 0.000 | 0.000 |        | 2  | 0.556 | 0.075   |       |
|             | Cit       | 0  | 0.000 | 0.000 | 0.000 | 0.000 | -     | -     |        | 1  | 0.000 | 0.000   |       |
|             | For       | 7  | 0.004 | 0.005 | 0.000 | 0.000 | -     | 0.000 |        | 7  | 0.911 | 0.077   |       |
|             | Pap       | 6  | 0.004 | 0.006 | 0.000 | 0.000 | -     | 0.000 |        | 3  | 0.733 | 0.155   |       |
|             | Mic       | 14 | 0.012 | 0.016 | 0.018 | 0.000 | 0.000 | 0.000 |        | 4  | 0.031 | 0.177   |       |
|             | Ere       | 6  | 0.009 | 0.012 | 0.031 | 0.000 | 0.000 | 0.000 |        | 2  | 1.000 | 0.500   |       |
|             | Pon       | 4  | 0.003 | 0.004 | 0.000 | 0.000 | -     | 0.000 |        | 4  | 0.867 | 0.129   |       |
|             | AncTaxa   | 44 | 0.009 | 0.012 | 0.006 | 0.000 | 0.030 | 0.014 | -1.184 | 26 | 0.935 | 0.016   | 0.554 |
|             | Whole Pop | 45 | 0.008 | 0.011 | 0.005 | 0.000 | 0.024 | 0.010 | -1.173 | 30 | 0.908 | 0.019   |       |
|             | s.d.      |    | 0.001 |       |       |       |       |       |        |    |       |         |       |
| <b>TRPA</b> | Mand      | 14 | 0.005 | 0.008 | 0.011 | 0.003 | 0.286 | 0.423 |        | 3  | 0.385 | 0.149   |       |
|             | Pum       | 5  | 0.001 | 0.002 | 0.003 | 0.001 | 0.327 | 0.414 |        | 3  | 0.378 | 0.181   |       |
|             | Cit       | 0  | 0.000 | 0.000 | 0.000 | 0.000 | -     | -     |        | 1  | 0.000 | 0.000   |       |
|             | For       | 8  | 0.003 | 0.005 | 0.002 | 0.002 | 0.779 | 0.341 |        | 7  | 0.911 | 0.077   |       |
|             | Pap       | 10 | 0.005 | 0.017 | 0.014 | 0.006 | 0.430 | 0.355 |        | 5  | 0.933 | 0.122   |       |
|             | Mic       | 15 | 0.010 | 0.012 | 0.017 | 0.008 | 0.486 | 0.682 |        | 4  | 1.000 | 0.177   |       |
|             | Ere       | 7  | 0.009 | 0.013 | 0.025 | 0.006 | 0.242 | 0.469 |        | 2  | 1.000 | 0.500   |       |
|             | Pon       | 4  | 0.002 | 0.006 | 0.004 | 0.000 | 0.000 | 0.000 |        | 3  | 0.733 | 0.155   |       |
|             | AncTaxa   | 56 | 0.014 | 0.020 | 0.025 | 0.010 | 0.411 | 0.514 | -0.705 | 26 | 0.918 | 0.019   | 0.688 |
|             | Whole Pop | 57 | 0.012 | 0.018 | 0.022 | 0.009 | 0.430 | 0.518 | -0.745 | 32 | 0.883 | 0.022   |       |
|             | s.d.      |    | 0.001 |       |       |       |       |       |        |    |       |         |       |
| <b>INVA</b> | Mand      | 22 | 0.008 | 0.010 | 0.022 | 0.004 | 0.190 | 0.401 |        | 8  | 0.867 | 0.060   |       |
|             | Pum       | 11 | 0.004 | 0.004 | 0.010 | 0.004 | 0.397 | 0.848 |        | 6  | 0.778 | 0.137   |       |
|             | Cit       | 6  | 0.002 | 0.003 | 0.003 | 0.002 | 0.614 | 0.656 |        | 3  | 0.622 | 0.138   |       |
|             | For       | 9  | 0.004 | 0.006 | 0.015 | 0.001 | 0.091 | 0.226 |        | 5  | 0.800 | 0.100   |       |
|             | Pap       | 22 | 0.012 | 0.019 | 0.028 | 0.004 | 0.148 | 0.219 |        | 6  | 1.000 | 0.096   |       |
|             | Mic       | 13 | 0.008 | 0.011 | 0.017 | 0.003 | 0.177 | 0.268 |        | 4  | 1.000 | 0.177   |       |
|             | Ere       | 0  | 0.000 | 0.000 | 0.000 | 0.000 | -     | -     |        | 1  | 0.000 | 0.000   |       |
|             | Ponc      | 2  | 0.001 | 0.001 | 0.004 | 0.002 | 0.345 | 1.462 |        | 2  | 0.733 | 0.155   |       |
|             | AncTaxa   | 69 | 0.014 | 0.017 | 0.039 | 0.008 | 0.197 | 0.449 | -0.640 | 34 | 0.970 | 0.009   | 0.593 |
|             | Whole Pop | 72 | 0.014 | 0.019 | 0.031 | 0.007 | 0.226 | 0.368 | -0.514 | 49 | 0.975 | 0.006   |       |
|             | s.d.      |    | 0.000 |       |       |       |       |       |        |    |       |         |       |
| <b>PEPC</b> | Mand      | 3  | 0.001 | 0.002 | 0.000 | 0.000 | -     | 0.000 |        | 3  | 0.001 | 0.138   |       |
|             | Pum       | 3  | 0.001 | 0.002 | 0.000 | 0.000 | -     | 0.000 |        | 4  | 0.001 | 0.152   |       |
|             | Cit       | 1  | 0.001 | 0.001 | 0.000 | 0.000 | -     | 0.000 |        | 2  | 0.001 | 0.095   |       |
|             | For       | 12 | 0.006 | 0.006 | 0.000 | 0.000 | -     | 0.000 |        | 4  | 0.006 | 0.101   |       |
|             | Pap       | 5  | 0.003 | 0.004 | 0.000 | 0.000 | -     | 0.000 |        | 4  | 0.800 | 0.172   |       |
|             | Mic       | 10 | 0.008 | 0.008 | 0.033 | 0.000 | 0.000 | 0.000 |        | 3  | 0.833 | 0.222   |       |
|             | Ere       | 4  | 0.006 | 0.006 | 0.066 | 0.000 | 0.000 | 0.000 |        | 2  | 1.000 | 0.500   |       |
|             | Ponc      | 5  | 0.004 | 0.004 | 0.000 | 0.000 | -     | 0.000 |        | 3  | 0.733 | 0.155   |       |
|             | AncTaxa   | 52 | 0.014 | 0.015 | 0.016 | 0.000 | 0.000 | 0.000 | -0.821 | 25 | 0.945 | 0.013   | 0.714 |
|             | Whole Pop | 53 | 0.013 | 0.014 | 0.012 | 0.000 | 0.000 | 0.000 | -0.757 | 33 | 0.950 | 0.011   |       |
|             | s.d.      |    | 0.000 |       |       |       |       |       |        |    |       |         |       |
| <b>PKF</b>  | Mand      | 9  | 0.003 | 0.004 | 0.003 | 0.003 | 0.914 | 0.681 |        | 4  | 0.659 | 0.120   |       |
|             | Pum       | 1  | 0.000 | 0.000 | 0.000 | 0.000 | -     | 0.000 |        | 2  | 0.200 | 0.154   |       |
|             | Cit       | 2  | 0.001 | 0.000 | 0.000 | 0.002 | -     | -     |        | 2  | 0.356 | 0.159   |       |
|             | For       | 6  | 0.002 | 0.003 | 0.000 | 0.000 | -     | 0.000 |        | 3  | 0.378 | 0.181   |       |
|             | Pap       | 12 | 0.008 | 0.010 | 0.000 | 0.005 | -     | 0.517 |        | 4  | 0.867 | 0.129   |       |
|             | Mic       | 2  | 0.002 | 0.000 | 0.000 | 0.004 | -     | -     |        | 3  | 0.833 | 0.222   |       |
|             | Ere       | 4  | 0.005 | 0.007 | 0.000 | 0.003 | -     | 0.492 |        | 2  | 1.000 | 0.500   |       |
|             | Pon       | 0  | 0.000 | 0.000 | 0.000 | 0.000 | -     | -     |        | 1  | 0.000 | 0.000   |       |
|             | AncTaxa   | 38 | 0.009 | 0.012 | 0.005 | 0.006 | 1.072 | 0.491 | -0.855 | 21 | 0.925 | 0.014   | 0.647 |
|             | Whole Pop | 44 | 0.009 | 0.011 | 0.006 | 0.006 | 0.883 | 0.514 | -1.058 | 27 | 0.937 | 0.010   |       |
|             | s.d.      |    | 0.000 |       |       |       |       |       |        |    |       |         |       |
| <b>DXS</b>  | Mand      | 14 | 0.006 | 0.009 | 0.009 | 0.002 | 0.227 | 0.228 |        | 6  | 0.767 | 0.084   |       |
|             | Pum       | 4  | 0.003 | 0.004 | 0.007 | 0.000 | 0.000 | 0.000 |        | 4  | 0.733 | 0.101   |       |
|             | Cit       | 2  | 0.001 | 0.001 | 0.006 | 0.001 | 0.235 | 1.219 |        | 3  | 0.689 | 0.104   |       |
|             | For       | 7  | 0.004 | 0.006 | 0.005 | 0.001 | 0.301 | 0.230 |        | 7  | 0.911 | 0.077   |       |
|             | Pap       | 17 | 0.012 | 0.016 | 0.015 | 0.007 | 0.466 | 0.434 |        | 6  | 1.000 | 0.096   |       |
|             | Mic       | 4  | 0.003 | 0.004 | 0.006 | 0.002 | 0.304 | 0.534 |        | 3  | 0.833 | 0.222   |       |
|             | Ere       | 7  | 0.010 | 0.013 | 0.026 | 0.004 | 0.153 | 0.296 |        | 2  | 1.000 | 0.500   |       |
|             | Pon       | 4  | 0.003 | 0.005 | 0.000 | 0.000 | -     | 0.000 |        | 2  | 0.533 | 0.172   |       |
|             | AncTaxa   | 51 | 0.015 | 0.021 | 0.018 | 0.006 | 0.348 | 0.289 | -0.321 | 32 | 0.967 | 0.009   | 0.659 |





FIG. S1. Neighbor-Joining tree with all the SNP markers in the whole population studied, ancestral *Citrus* species, relatives, secondary species and interspecific hybrids (1000 bootstraps performed). Branch support over 50% represented.

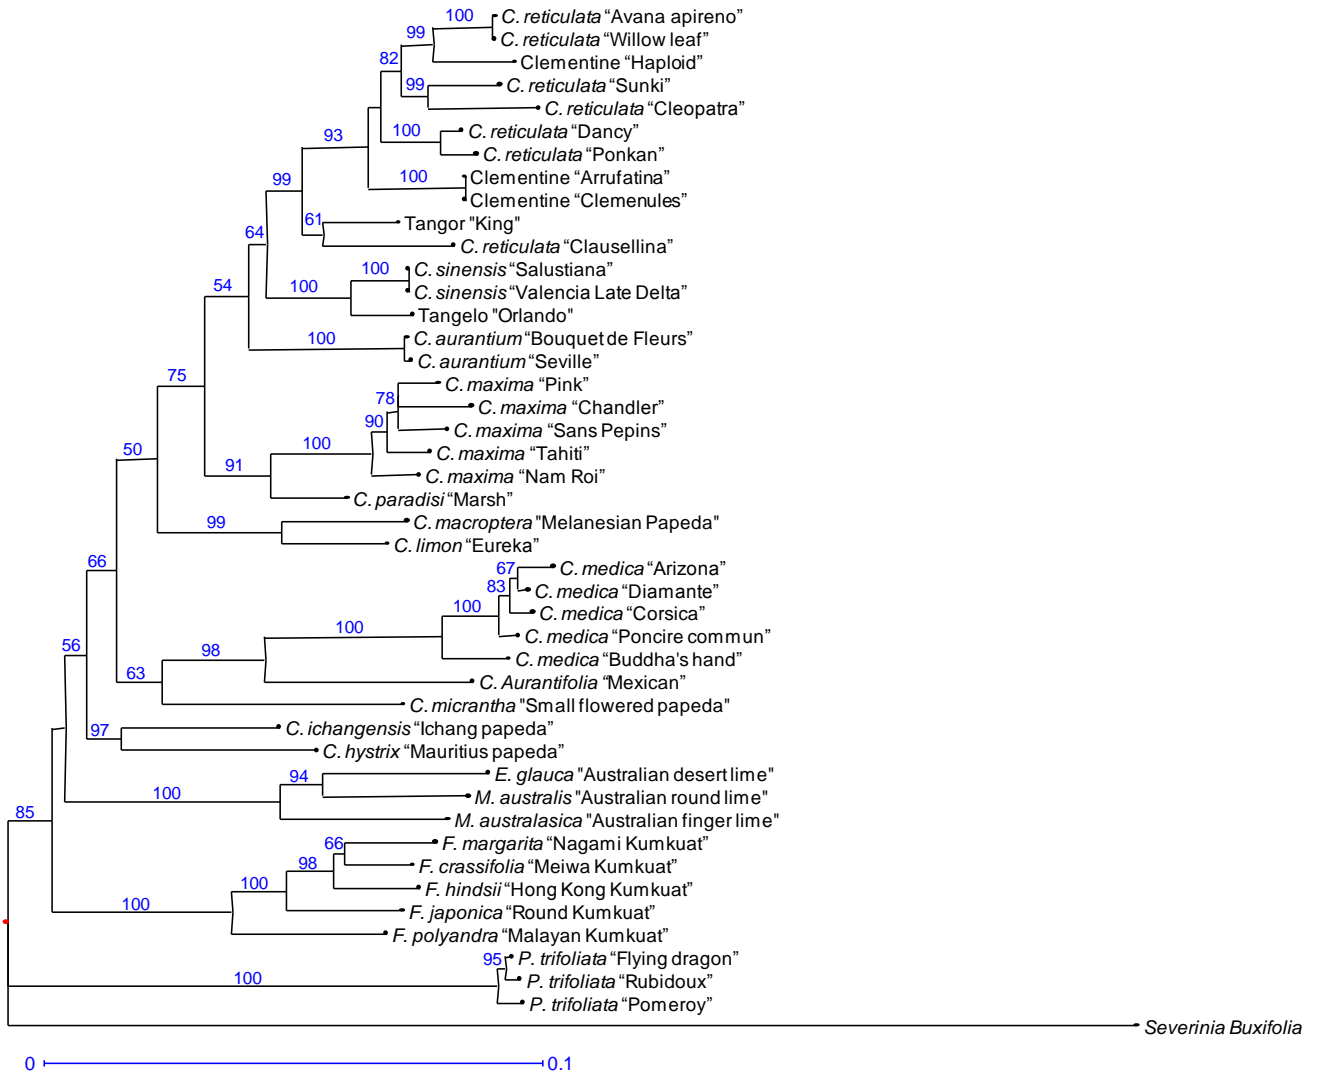

Supplement: supp_mcs227_mcs227supp.pdf [file supp_mcs227_mcs227supp.pdf]
